# Supplementary material for: Hypoglycin A Content in Blood and Urine Discriminates Horses with Atypical Myopathy from Clinically Normal Horses Grazing on the Same Pasture
Source: PLoS One. 2015 Sep 17;10(9):e0136785. doi: 10.1371/journal.pone.0136785 (PMC4574941; doi:10.1371/journal.pone.0136785)
Supplement: S1 Table — (DOCX) [file pone.0136785.s001.docx]

**Supporting Information**

| S1 Table: MS parameters for MRM-transitions   | Analyte | MRM transitions | Declustering potential (DP), V | Entrance potential (EP), V | Cell entrance potential (CEP), V | | --- | --- | --- | --- | --- | | Fmoc-Hypoglycin | **362→166**  *362→122a* | -30  -30 | -3  -3 | -20  -20 | | Fmoc-Norvaline | **338→116**  *338→14a* | -15  -15 | -8  -8 | -25  -25 | | |
| --- | --- | --- | --- | --- | --- | --- | --- | --- | --- | --- | --- | --- | --- | --- | --- | --- |
| Quantifier and qualifier transitions are indicated in bold and italics, respectively |
